# Predictors of Recurrent Sickness Absence Due to Depressive Disorders – A Delphi Approach Involving Scientists and Physicians

Giny Norder<sup>1,2\*</sup>, Corné A. M. Roelen<sup>1,2</sup>, Willem van Rhenen<sup>1,3</sup>, Jan Buitenhuis<sup>4</sup>, Ute Bültmann<sup>2</sup>, Johannes R. Anema<sup>5,6</sup>

**1** 365/Occupational Health Service Utrecht, Utrecht, The Netherlands, **2** Department of Health Sciences, University Medical Center Groningen, University of Groningen, Groningen, The Netherlands, **3** Center for Human Resource, Organization and Management Effectiveness, Business University Nyenrode, Breukelen, The Netherlands, **4** Univé Insurances Medical Department, Assen, The Netherlands, **5** Department of Public and Occupational Health, EMGO+ Institute for Health and Care Research, VU University Medical Center, Amsterdam, The Netherlands, **6** Research Center for Insurance Medicine, Amsterdam, The Netherlands

## Abstract

**Background:** Depression is a common and highly recurrent mental disorder that is accompanied by poor functioning at home and at work. Not all depressed employees report sick and little is known about variables associated with sickness absence (SA) due to depression. Recurrent SA due to depression tends to marginalize employees from the workforce and exclude them from social participation. Therefore, this study sought group consensus on factors predicting recurrent SA due to depression.

**Methodology/principal findings:** 23 scientists in the field of work and mental health and 23 physicians with expertise in assessing work disability were invited for a Delphi study. Sixty-seven factors retrieved from the literature were scored for their impact on the recurrence of SA due to depression, range 1 (no impact) to 10 (very high impact) in two Delphi rounds. The third Delphi round addressed the assessability and modifiability of elected predictors. Group consensus was defined as 75% agreement. In the first round (response 78%), group consensus was reached on a high impact of 13 factors on recurrent SA due to depression. The second round (response 79%) added another 8 factors with high impact on recurrent SA due to depression. The panelists were of the opinion that stressful life and work events, age at first diagnosis, duration of the last depressive episode, anxiety, lifetime number of depressive episodes, and psychological work demands were readily assessable in consultation with patients. Furthermore, work factors, particularly decision latitude, psychological job demands, and commitment to work, were recognized as modifiable.

**Conclusions/significance:** Although results have to be validated with further quantitative research, physicians may identify employees at risk of recurrent SA due to depression and may support them to adjust their work aimed at increasing commitment to work and preventing future SA due to depression.

**Citation:** Norder G, Roelen CAM, van Rhenen W, Buitenhuis J, Bültmann U, et al. (2012) Predictors of Recurrent Sickness Absence Due to Depressive Disorders – A Delphi Approach Involving Scientists and Physicians. PLoS ONE 7(12): e51792. doi:10.1371/journal.pone.0051792

**Editor:** Marianna Mazza, Catholic University of Sacred Heart of Rome, Italy

**Received:** July 16, 2012; **Accepted:** November 9, 2012; **Published:** December 20, 2012

**Copyright:** © 2012 Norder et al. This is an open-access article distributed under the terms of the Creative Commons Attribution License, which permits unrestricted use, distribution, and reproduction in any medium, provided the original author and source are credited.

**Funding:** The authors have no support or funding to report.

**Competing Interests:** The authors have declared that no competing interests exist.

\* E-mail: giny.norder@365.nl

## Introduction

Depression is a common disorder in developed countries with a lifetime prevalence of up to 25% for women and 12% for men [1]. Depression is characterized by substantial impairment of an individual's ability to take care of everyday responsibilities at home and at work [2]. Depressed persons are more often unemployed or on sickness absence (SA), and have more work performance deficits than non-depressed persons [3,4]. Studies of work productivity and functioning of depressed employees most frequently consider disease-related factors, whereas personal factors and work-related factors are less frequently addressed. Work productivity was found to be strongly associated with the duration of depression and moderately with the severity of

depression, co-morbid mental or physical disorders, older age, and a history of previous SA or work disability [5].

After recovery from an episode of depression, the chances of maintaining that recovery decrease over time [1]. Theory and research have assumed a chronic and recurrent disease model for depression [6]. In a systematic review of the literature, Hardeveld et al. (2010) reported recurrences in 85% of patients in specialized mental healthcare settings and in 35% of persons in the general population [7]. Since 2000, literature reviews have reported a total of 67 factors predicting recurrences of depression [7–16].

Factors associated with recurrent depression may differ from those associated with recurrent SA due to depression, as depression not always results in SA. Some depressed employees may report sick, while others stay at work. In a Norwegian population survey, the number of men and women who had

consulted a physician or taken medication because of mental health problems were 11 and 18 times higher, respectively, than the number of men and women who had SA due to mental health problems [17]. If depressed individuals report sick, they often stay off work for a long period of time and may even transfer to disability pension after one year of SA [18–23], explaining part of the economic burden and high societal costs of depression [24–26].

Long-term SA, especially recurrent long-term SA, increases the probability of being excluded from the workforce and consequently threatens social participation. Therefore, it is important to identify employees at risk of recurrent SA due to depression. High-risk employees can then be invited for counselling and, if appropriate, referred to targeted interventions [27], all the more because the course of depression worsens with each recurrence [1]. Systematic reviews of the literature have revealed predictors of recurrent depression, but there is no literature on predictors of recurrent SA due to depression. The purpose of this study was to reach group consensus on a set of predictors of recurrent SA due to depression by using a Delphi approach.

## Methods

### Study design

The Delphi approach is an iterative multistage process designed to transform personal opinion into group consensus [28]. A modified Delphi procedure consisting of several rounds was used to reach consensus on predictors of recurrent SA due to depression. The first Delphi round took place in a period of four months directly followed by a second Delphi round which took three months. A third Delphi round was used to determine whether or not the elected predictors were assessable and modifiable.

### Ethics statement

The study was approved by the Medical Ethics Committee of the University Medical Center Groningen, who advised us that written informed consent was not necessary because participants in the Delphi procedure were neither subject to treatments nor engaged in specific behaviors. Participants provided verbal informed consent to participate in the Delphi procedure by e-mail. This consent procedure was approved by the Medical Ethics Committee of the University Medical Center Groningen.

### Study definitions

**Depression.** Depression is a mood disturbance characterized by a loss of interest or pleasure in normal everyday activities. Depression was defined according to the criteria of the International Classification of Diseases (ICD-10) and encompassed depressive episodes (ICD-10 F32), recurrent depressive disorders (ICD-10 F33), and persistent mood disorders (ICD-10 F34) such as dysthymia. Depressive symptoms within two months of the loss of a loved one were not included because depression cannot be diagnosed if depressive symptoms are better accounted for by bereavement [29]. Furthermore, bipolar depressive disorders (ICD-10 F31) were not included in the definition of depression, because bipolar depressive disorders share more risk factors, neural substrates, cognitions and endophenotypes with schizophrenia than with unipolar depression [30].

**Sickness absence.** Sickness absence (SA) was defined as a financially compensated temporary medically certified absence or leave from work, due to any (i.e., work-related as well as non work-related) illness or injury. In the Delphi procedure, the focus was on recurrent long-term SA due to depression. Long-term SA is

defined differentially across countries. In this study, we averaged the duration of long-term SA to 2 months in line with DSM-IV criteria, stating that depressive disorder can be diagnosed if symptoms persist for longer than 2 months [29]. Long-term SA was maximized at 1 year because SA compensation is restricted to a 1-year period in many countries, after which employees are transferred to other types of compensation such as rehabilitation allowances or disability pensions.

A recurrence was defined as a new SA episode due to depression occurring  $\geq 4$  weeks after a previous SA episode as Dutch sickness insurance policies regard two SA episodes with less than 4 weeks worked between them as one SA period. Koopmans et al. demonstrated that 90% of recurrences of mental SA occurred within 3 years of a first mental SA episode [31]. Therefore, we instructed the Delphi panelists that recurrences were assumed to occur within 3 years of recovery from a previous SA episode due to depression.

### Panelists

Purposive convenience sampling was used to construct a panel of 46 members with scientific ( $n = 23$ ) or professional ( $n = 23$ ) expertise in the field of mental health and work. Twenty scientists, regarded by the authors as experts in the field of mental health and work, were contacted via e-mail to ask whether they: i) had the expertise and time to participate in the Delphi procedure, and ii) knew scientists in the field that had yet to be contacted. Thirteen scientists agreed to participate and they suggested another 10 scientists. Hence, a total of 23 scientists of whom 8 were from the Netherlands, 7 from the rest of Europe, and 8 from North America participated in the Delphi procedure. At inclusion, the scientists had been publishing on mental health and work issues in international peer-reviewed journals abstracted in Medline for on average 13 years (range 2–27 years). To add opinions from the work field, occupational physicians working at 365/ArboNed and physicians of the Dutch Association of Medical Insurance Advisors were invited to participate in the Delphi procedure. A total of 23 physicians with an experience in the assessment of work disability for on average 19 years (range 11–33 years) agreed to participate in the Delphi procedure.

### Data collection

A total of 67 factors associated with recurrent depression were retrieved from recent literature reviews [7–15] and the Dutch multidisciplinary guideline for depression [16]. To assess their impact on recurrent SA due to depression, a score range of 1 (no impact) to 10 (very high impact) was applied to each of these factors. Subsequently, the factors were categorized as person-related factors, disease-related factors, and work-related factors. Person-related factors included sociodemographics (e.g., age, gender, socioeconomic and marital status, number of children living at home, and care for others), family history (e.g. depression of parents or other family members and childhood life events or adversities), and cognitions (e.g., neuroticism, irrational beliefs, self-efficacy, and self-esteem). Examples of disease-related factors were the severity and duration of depression, comorbid psychopathology, and both work and social dysfunctioning as a result of depression. Work-related factors involved exposures to noise, light, or toxics as well as factors such as job demands, job control, work efforts and rewards, commitment to work, support at the workplace, and stressful events/bullying at work. Apart from an opinion on the impact of each separate factor, an overall opinion was asked on the impact of these categories with a score range of 1 (no impact) to 10 (very high impact). The Delphi questionnaire

was sent by e-mail to the Delphi panelists and reminders were sent monthly.

After the first round, the predictors on which consensus was reached were removed from the Delphi questionnaire. Hence, the second round Delphi questionnaire only included the factors on which no consensus was reached yet, together with their first round score range to provide the panelists with some feedback [28]. The second round Delphi questionnaire was sent by e-mail to the panelists and reminders were sent monthly.

In the third Delphi round, the panelists were asked to indicate if the elected predictors are readily assessable by physicians in consultation with patients. The panelists were also asked to give their opinion on the modifiability of the elected predictors by asking them how much effort would be required to change a predictor [32].

## Data analysis

As there is no universal agreement for Delphi procedures, consideration must be given to the level of consensus. McKenna (1994) suggested that consensus should be equated with 51% agreement amongst respondents [33], whereas Sumsion (1998) recommended 70% agreement [34] and Green et al. (1999) proposed 80% agreement [35]. In this study, group consensus was defined as a 75% agreement. If 75% or more of the panelists rated a factor with a score  $\geq 7$  (on a range of 1–10), this was considered as group consensus on high impact on recurrent SA due to depression. Furthermore, if 75% of the panelists regarded a factor as assessable in consultation with employees, this was considered as group consensus that the factor was readily assessable and if 75% of the panelists thought that predictors could be modified with little or some effort, this was regarded as group consensus on the modifiability of predictors.

Differences between the rating of scientists and physicians were examined with the non-parametric Mann-Whitney and Fischer's exact tests in SPSS for Windows, version 20. Statistical significance was concluded for  $p < 0.05$ .

## Results

### First Delphi round

In the first round, 36 panel members (78%) returned the Delphi questionnaire, of which 18 were scientists and 18 physicians. Three panel members (2 scientists in the field of sociology and 1 physician) did not complete the questionnaire, because on second thought they considered themselves not knowledgeable on the subject. The remaining 16 scientists had a higher score on the category of work-related predictors than 17 physicians (Table 1), meaning that scientists accredited work factors a higher impact on recurring SA due to depressive disorders. Physicians accredited more impact to person-related predictors, particularly socio-demographic variables and family history.

Group consensus was reached on a high impact of the lifetime number of depressive episodes, substance abuse, residual symptoms after resuming work, social and work dysfunctioning, comorbid anxiety and comorbid DSM (axis I and II) disorders, neuroticism, stressful events in private life or at work, commitment to work, and high demands in work combined with low control over work (Table 2).

### Second Delphi round

In the second Delphi round, 34 (79%) of 43 remaining panel members returned the questionnaire and group consensus was reached on another 8 predictors: age at the time of the first depressive episode, severity and duration of the first and last

**Table 1.** Categories for predicting recurrent sickness absence due to depression.

|                            | Scientists | Physicians | Mann-Whitney |
|----------------------------|------------|------------|--------------|
| Person-related factors     |            |            |              |
| Sociodemographics          | 5 (5–7)    | 7 (6–8)    | $P < 0.01$   |
| Family history             | 4 (3–6)    | 5 (5–7)    | $P = 0.0$    |
| Personality and cognitions | 6.5 (5–7)  | 7 (6–7)    | $P = 0.82$   |
| Disease-related factors    | 8 (7–9)    | 8 (7–9)    | $P = 0.97$   |
| Work-related factors       | 7 (6–9)    | 6 (5–7)    | $P = 0.02$   |

The table shows median scores (interquartile range) of 16 scientists with a 13-year experience in the field of mental health and work and 17 physicians with a 19-year experience in assessing work disability due to mental health problems, on a range from 1 to 10.

doi:10.1371/journal.pone.0051792.t001

depressive episodes, and the work factors psychological demands, effort-reward imbalance, and decision latitude (Table 2).

### Third Delphi round

In the third Delphi round, the panelists gave their opinion on whether or not the high-impact factors were readily assessable and modifiable. A total of 36 panelists (81%) returned the questionnaire and reached group consensus that stressful life and work events, age at first diagnosis, duration of the last depressive episode, anxiety symptoms, the lifetime number of depressive episodes, and psychological work demands were readily assessable in consultation with patients (Table 3). Scientists and physicians did not differ significantly in their opinion on the assessability of predictors.

Although both scientists and physicians indicated that work factors, particularly decision latitude, psychological job demands, and commitment to work, were best modifiable, no group consensus was reached on the modifiability of predictors (Table 4).

## Discussion

Of 67 factors reported in the literature to predict recurrences of depression, 21 were thought important for predicting recurrent sickness absence (SA) due to depression. Scientists and physicians reached consensus on a high impact of predictors associated with the clinical picture, though these predictors were estimated as difficultly or not modifiable. Work factors, especially decision latitude, psychological job demands, and commitment to work were thought to be best modifiable, although no group consensus was reached on the modifiability of variables predicting recurrent SA due to depression.

### Strengths and weaknesses

An asset of the study was the high response rate in all three Delphi-rounds. A response rate  $> 70\%$  was suggested by Sumsion (1998) to be essential to maintain the rigor of the Delphi approach [34]. Furthermore, the Delphi approach combined the opinions of experts and professionals in the field of mental health and work into group consensus.

Green et al. (1999) have shown that two or three rounds sufficed to reach consensus [35]. The present study used two rounds during which no items were added and the wording of items remained exactly the same [28]. In the second Delphi round, the panelists were informed about the first round score ranges of items, which enabled them to see where their responses stood in relation to the

**Table 2.** Results of Delphi rounds 1 and 2.

|                                          | Round 1    |            |            | Round 2    |            |            |
|------------------------------------------|------------|------------|------------|------------|------------|------------|
|                                          | Scientists | Physicians | Total      | Scientists | Physicians | Total      |
| Lifetime number of episodes <sup>a</sup> | 88%        | 100%       | <b>94%</b> |            |            |            |
| Substance abuse                          | 75%        | 100%       | <b>88%</b> |            |            |            |
| Work dysfunctioning                      | 94%        | 82%        | <b>88%</b> |            |            |            |
| Social dysfunctioning                    | 75%        | 82%        | <b>85%</b> |            |            |            |
| DSM axis II personality disorders        | 75%        | 88%        | <b>82%</b> |            |            |            |
| High demands – low control               | 81%        | 82%        | <b>82%</b> |            |            |            |
| Stressful work events                    | 81%        | 82%        | <b>82%</b> |            |            |            |
| Residual symptoms                        | 69%        | 88%        | <b>79%</b> |            |            |            |
| DSM axis I psychopathology               | 75%        | 82%        | <b>79%</b> |            |            |            |
| Anxiety                                  | 75%        | 82%        | <b>79%</b> |            |            |            |
| Neuroticism                              | 76%        | 76%        | <b>76%</b> |            |            |            |
| Stressful life events                    | 75%        | 76%        | <b>76%</b> |            |            |            |
| Commitment to work                       | 75%        | 76%        | <b>76%</b> |            |            |            |
| Severity of first episode <sup>a</sup>   | 50%        | 65%        | 58%        | 93%        | 84%        | <b>88%</b> |
| Severity of last episode <sup>a</sup>    | 75%        | 65%        | 70%        | 93%        | 79%        | <b>85%</b> |
| Duration of last episode <sup>a</sup>    | 63%        | 76%        | 70%        | 93%        | 68%        | <b>79%</b> |
| Duration of first episode <sup>a</sup>   | 44%        | 65%        | 55%        | 80%        | 79%        | <b>79%</b> |
| Effort – reward imbalance                | 69%        | 59%        | 64%        | 80%        | 79%        | <b>79%</b> |
| Age at first episode <sup>a</sup>        | 50%        | 82%        | 67%        | 73%        | 84%        | <b>79%</b> |
| Decision latitude                        | 75%        | 53%        | 64%        | 80%        | 74%        | <b>76%</b> |
| Psychological job demands                | 88%        | 59%        | 73%        | 80%        | 70%        | <b>75%</b> |
| Co-worker support                        | 63%        | 71%        | 67%        | 73%        | 74%        | 74%        |
| Supervisor support                       | 75%        | 65%        | 70%        | 80%        | 63%        | 71%        |
| Pessimism                                | 63%        | 65%        | 64%        | 60%        | 79%        | 71%        |
| Bullying at workplace                    | 88%        | 47%        | 67%        | 87%        | 53%        | 68%        |
| Role conflicts in work                   | 56%        | 47%        | 52%        | 67%        | 68%        | 68%        |
| Self-esteem                              | 56%        | 53%        | 55%        | 53%        | 74%        | 65%        |
| Self-efficacy                            | 50%        | 41%        | 45%        | 53%        | 74%        | 65%        |
| Job insecurity                           | 44%        | 65%        | 55%        | 73%        | 58%        | 65%        |
| Social support                           | 38%        | 71%        | 55%        | 40%        | 79%        | 62%        |

The table shows the 30 highest scoring factors and the percentages of panelists who scored the factor  $\geq 7$  (i.e. high impact on recurrent sickness absence due to depression); bold font indicates consensus.

<sup>a</sup>episode of depression.

doi:10.1371/journal.pone.0051792.t002

group. Such feedback contributes to reaching group consensus, though it was not possible to find out how much the panelists relied on it [28].

The panelists did not meet with each other face to face, which enabled them to react unbiased of the identities and pressures of others [33,36]. A disadvantage may be that consensus was weakened by not allowing panelists to discuss the issues raised and elaborate on their views [36,37].

Although the Delphi approach is based upon the assumption of safety in numbers, meaning that several people are less likely to arrive at a wrong decision than a single individual, there is no evidence of the reliability of the Delphi method in terms of reproducibility [28,36,37]. In other words: if the same information was given to other panels, the results may not necessarily be the same. The drawing of a convenience sample may have further undermined the Delphi's forecasting ability, though this weakness

was partially dealt with by asking the panelists for more experts or professionals from their networks.

With regard the validity of the Delphi procedure, the use of experts on mental health and work, and professionals with experience in the assessment of work disability of depressed employees helped to increase content validity and the use of successive rounds with the same questionnaire helped to increase the concurrent validity [37].

### Predictors of recurrent sickness absence due to depression

Of the 21 factors with assumed high impact on recurrent SA due to depression, 11 (52%) were associated with the clinical picture of depression. Obviously, the panelists accredited most importance to the clinical picture for predicting recurrent SA due to depression. Although in line with earlier findings [7,38], the results may have been biased by existing literature, which most

**Table 3.** Delphi round 3: Is the elected factor assessable in consultation with the patient?

|                               | Total          | Don't |      | Scientists | Physicians | Fisher's exact test |
|-------------------------------|----------------|-------|------|------------|------------|---------------------|
|                               | Yes (%)        | No    | know | Yes (%)    | Yes (%)    |                     |
| <b>Stressful life events</b>  | <b>33 (94)</b> | 2     | 0    | 17 (94)    | 16 (94)    | P = 0.743           |
| <b>Age at first diagnosis</b> | <b>32 (91)</b> | 2     | 1    | 15 (83)    | 17 (100)   | P = 0.242           |
| <b>Duration last episode</b>  | <b>31 (89)</b> | 4     | 0    | 16 (89)    | 15 (88)    | P = 0.677           |
| <b>Anxiety</b>                | <b>30 (86)</b> | 2     | 3    | 16 (89)    | 14 (83)    | P = 0.726           |
| <b>Stressful work events</b>  | <b>28 (80)</b> | 4     | 3    | 17 (94)    | 11 (63)    | P = 0.210           |
| <b>Lifetime episodes</b>      | <b>27 (77)</b> | 7     | 1    | 12 (67)    | 15 (88)    | P = 0.199           |
| <b>Psychological demands</b>  | <b>27 (77)</b> | 7     | 1    | 14 (78)    | 13 (76)    | P = 0.500           |
| Decision latitude             | 26 (74)        | 3     | 6    | 14 (78)    | 12 (71)    | P = 0.580           |
| Severity last episode         | 26 (74)        | 5     | 5    | 12 (67)    | 14 (83)    | P = 0.186           |
| Substance abuse               | 25 (71)        | 6     | 4    | 15 (83)    | 10 (59)    | P = 0.072           |
| Commitment to work            | 24 (69)        | 7     | 3    | 12 (67)    | 12 (71)    | P = 0.539           |
| Duration first episode        | 22 (63)        | 10    | 3    | 11 (61)    | 11 (65)    | P = 0.445           |
| Work dysfunctioning           | 22 (63)        | 10    | 3    | 12 (67)    | 10 (59)    | P = 0.541           |
| Residual symptoms             | 20 (57)        | 10    | 5    | 13 (72)    | 7 (41)     | P = 0.181           |
| High demands low control      | 20 (57)        | 12    | 3    | 9 (50)     | 11 (65)    | P = 0.358           |
| DSM axis I pathology          | 19 (54)        | 12    | 4    | 7 (39)     | 12 (71)    | P = 0.033           |
| Social dysfunctioning         | 19 (54)        | 12    | 4    | 11 (61)    | 8 (47)     | P = 0.638           |
| Effort-reward imbalance       | 19 (54)        | 13    | 3    | 10 (56)    | 9 (53)     | P = 0.615           |
| Neuroticism                   | 18 (51)        | 11    | 6    | 7 (39)     | 11 (65)    | P = 0.082           |
| Severity first episode        | 12 (34)        | 15    | 8    | 7 (39)     | 5 (29)     | P = 0.552           |
| DSM axis II pathology         | 9 (26)         | 21    | 5    | 5 (28)     | 4 (24)     | P = 0.596           |

The table shows the number of panelists per answer category and Fisher's exact test of differences between scientists and physicians; bold font represents consensus. doi:10.1371/journal.pone.0051792.t003

often reports on the relationship between disease-related factors and both work productivity of depressed employees [5].

Scientists valued work factors as more important predictors of recurrent SA due to depression than physicians did. Possibly, physicians have a more 'clinical look' and pay attention to the medical aspects of SA, whereas scientists may consider SA from a more environmental context. Irrespective of the different appraisal of work factors, both scientists and physicians were of the opinion that work factors were best modifiable. Hence, interventions to prevent recurrent SA due to depression could be targeted at work conditions, especially decision latitude in work, psychological job demands, and commitment to work. In this regard, it is interesting to note that participatory workplace interventions, consisting of a stepwise process to support employees and supervisors in identifying and solving obstacles for return to work, was effective for sustainable return to work of sick-listed employees with distress [39]. Participatory workplace interventions may offer an opportunity for depressed employees and their supervisors to discuss and adjust barriers in work to prevent recurrent SA due to depression.

The current study sought for group consensus among scientists and physicians. Other stakeholders such as supervisors and employees were not involved in this Delphi study. Earlier research has shown that employees, supervisors and occupational physicians differ in their opinion in what they see as important for return to work after SA due to depression [40]. The perspectives of physicians and supervisors were generally more similar to each other than to employees' perspectives. Employees' perspectives were not included in this study because these are less important for

the predictability of recurrent SA since most individuals will not anticipate future illnesses or injuries.

### Meaning of the study

From systematic reviews of the literature in the last decade, a total of 67 variables were found to be associated with recurrent depression. Not all depressed patients will report sick, i.e. recurrent depression is not the same as recurrent SA due to depression. SA has important societal, organizational and personal consequences. For example, SA excludes individuals from work and marginalizes their social participation. Besides, SA is a strong predictor of future poor health, low mental well-being, low work ability and increased mortality [41–44]. During a 13-year follow-up, the hazard ratio for mortality was 1.9 for SA with psychiatric diagnoses [41]. Furthermore, psychiatric and non-psychiatric SA predict future depression with a fully adjusted odds ratio of 1.53 for one SA episode and 1.95 for two SA episodes [45]. Obviously, it is important to identify which depressed patients are at risk of SA, especially recurrent SA. By using a Delphi approach, expert group consensus was reached that stressful life and work events, age at first diagnosis, duration of the last depressive episode, anxiety symptoms, the lifetime number of depressive episodes, and psychological work demands are predictors of recurrent SA due to depression that are readily assessable in consultation with patients without the use of questionnaires or other diagnostic tools. Although these 7 variables have yet to be further validated in quantitative research, physicians may use them to decide which depressed employees should be followed and monitored because of their risk of recurrent SA. Physicians may decide to counsel

**Table 4.** Delphi round 3: How much effort is needed to change the elected factor?

|                           | Don't know | Yes, with little or some effort | Not easily modifiable |
|---------------------------|------------|---------------------------------|-----------------------|
| Decision latitude         | 4          | 17 (55%)                        | 14 (45%)              |
| Psychological demands     | 2          | 17 (52%)                        | 16 (48%)              |
| Commitment to work        | 3          | 14 (44%)                        | 18 (56%)              |
| Social dysfunctioning     | 1          | 16 (47%)                        | 18 (53%)              |
| Work dysfunctioning       | 1          | 16 (47%)                        | 18 (53%)              |
| Anxiety                   | 4          | 14 (45%)                        | 17 (55%)              |
| Effort – reward imbalance | 2          | 15 (45%)                        | 18 (55%)              |
| DSM-axis I pathology      | 8          | 11 (41%)                        | 16 (59%)              |
| Stressful work events     | 3          | 13 (41%)                        | 19 (59%)              |
| High demands low control  | 2          | 13 (39%)                        | 20 (61%)              |
| Residual symptoms         | 5          | 11 (37%)                        | 19 (63%)              |
| Substance abuse           | 1          | 8 (24%)                         | 26 (76%)              |
| Duration last episode     | 2          | 4 (12%)                         | 29 (88%)              |
| Neuroticism               | 4          | 3 (10%)                         | 28 (90%)              |
| Severity last episode     | 3          | 3 (9%)                          | 29 (91%)              |
| Lifetime episodes         | -          | 3 (9%)                          | 32 (91%)              |
| Stressful life events     | 2          | 2 (6%)                          | 31 (94%)              |
| Severity first episode    | 1          | 2 (6%)                          | 32 (94%)              |
| Duration first episode    | 1          | 1 (3%)                          | 33 (97%)              |
| DSM-axis II pathology     | 5          | 0                               | 30 (100%)             |
| Age at first diagnosis    | 3          | 0                               | 32 (100%)             |

The table shows the number (%) of panelists per answer category.  
doi:10.1371/journal.pone.0051792.t004

employees at risk of recurrent SA due to depression to evaluate their symptoms and needs, advise work adjustments or refer them to specialist treatment in order to prevent recurrent SA.

## Acknowledgments

The authors wish to thank the panelists for their participation in this Delphi study.

## References

- Gelenberg AJ (2010) The prevalence and impact of depression. *J Clin Psychiatry* 71: e06.
- World Health Organization. Available: [http://www.who.int/mental\\_health/management/depression/en/](http://www.who.int/mental_health/management/depression/en/). Accessed 2012 Nov 15.
- Lerner D, Adler DA, Chang H, Lapitsky L, Hood M, et al. (2004) Unemployment, job retention, and productivity loss among employees with depression. *Psychiatr Serv* 55: 1371–1388.
- Lerner D, Henke RM (2008) What does research tell us about depression, job performance and work productivity? *J Occup Environ Med* 50: 401–410.
- Lagerfeld SE, Bültmann U, Franche RL, van Dijk FJ, Vlasveld MC, et al. (2010) Factors associated with work participation and work functioning in depressed workers: a systematic review. *J Occup Rehabil* 20: 275–292.
- Monroe SM, Harkness KL (2011) Recurrence in major depression: a conceptual analysis. *Psychol Rev* 118: 655–674.
- Hardeveld F, Spijker J, De Graaf R, Nolen WA, Beekman ATF (2010) Prevalence and predictors of recurrence of major depressive disorders in the adult population. *Acta Psychiatr Scand* 122: 184–191.
- Kessing LV, Andersen PK (2005) Predictive effects of previous episodes on the risk of recurrence in depressive and bipolar disorders. *Curr Psychiatry Rep* 7: 413–420.
- Pezawas L, Angst J, Kasper S (2005) Recurrent brief depression revisited. *Int Rev Psychiatry* 17: 63–70.
- Burcusa SL, Iacono WG (2007) Risk for recurrence in depression. *Clin Psychol Rev* 27: 959–985.
- Vittengl JR, Clark LA, Dunn TW, Jarrett RB (2007) Reducing relapse and recurrence in unipolar depression: a comparative meta-analysis of cognitive-behavioral therapy's effects. *J Consult Clin Psychol* 75: 475–488.
- Robinson OJ, Sahakian BJ (2008) Recurrence in major depressive disorder: a neurocognitive perspective. *Psychol Med* 38: 315–318.
- Stroud CB, Davila J, Moyer A (2008) The relationship between stress and depression in first onsets versus recurrences: a meta-analytic review. *J Abnorm Psychol* 117: 206–213.
- Woo JM, Postolache TT (2008) The impact of work environment of mood disorders and suicide: evidence and implications. *Int J Disabil Hum Dev* 7: 185–200.
- Stansfeld S, Candy B (2006) Psychosocial work environment and mental health – a meta-analytic review. *Scand J Work Environ Health* 32: 443–462.
- Dutch Institute for Health Care Improvement. Multidisciplinary guideline for depression. Utrecht: CBO (2009).
- Sandanger I, Nygård J, Brage S, Tellnes G (2000) Relation between health problems and sickness absence: gender and age differences – a comparison of low back pain, psychiatric disorders and injuries. *Scand J Public Health* 28: 244–252.
- Bültmann U, Rugulies R, Lund T, Christensen B, Labriola M, et al. (2006) Depressive symptoms and the risk of long-term sickness absence: a prospective study among 4747 employees in Denmark. *Soc Psychiatry Psychiatr Epidemiol* 41: 875–880.
- Koopmans PC, Roelen CA, Groothoff JW (2008) Sickness absence due to depression. *Int Arch Occup Environ Health* 81: 711–719.
- Bültmann U, Christensen KB, Burr H, Lund T, Rugulies R (2008) Severe depressive symptoms as predictor of disability pension: a 10-year follow-up study in Denmark. *Eur J Public Health* 18: 23–24.

## Author Contributions

Conceived and designed the experiments: GN CR UB JA. Performed the experiments: GN CR JB. Analyzed the data: CR. Contributed reagents/materials/analysis tools: GN CR UB JA. Wrote the paper: GN CR UB. Critical review: WvR JB JA.

21. Overland S, Glozier N, Sivertsen B, Stewart R, Neckelmann D, et al. (2008) A comparison of insomnia and depression as predictors of disability pension: the HUNT study. *Sleep* 31: 875–880.
22. Holma IA, Holma KM, Melartin TK, Ryttsälä HJ, Isometsä ET (2011) A 5-year prospective study of predictors of disability pension among patients with major depressive disorder. *Acta Psychiatr Scand* 125: 325–334.
23. Hjarsbech PU, Andersen RV, Christensen KB, Aust B, Borg V, et al. (2011) Clinical and non-clinical depressive symptoms and risk of long-term sickness absence among female employees in the Danish elderly care sector. *J Affect Disord* 129: 87–93.
24. Berto P, D'Ilario D, Ruffio P, Di Virgilio R, Rizzo F (2000) Depression: cost-of-illness studies in the international literature, a review. *J Mental Health Policy Econ* 3: 3–10.
25. Sobocki P, Jönsson B, Angst J, Rehnberg C (2006) Costs of depression in Europe. *J Mental Health Policy Econ* 9: 87–98.
26. Hu TW (2006) Perspectives: an international review of the national cost estimates of mental illness. *J Mental Health Policy Econ* 9: 3–13.
27. Lexis MA, Jansen NW, Huibers MJ, van Amelsvoort LG, Berkouwer A, et al. (2011) Prevention of long-term sickness absence and major depression in high-risk employees: a randomized controlled trial. *Occup Environ Med* 68: 400–407.
28. Hasson F, Keeney S, McKenna H (2000) Research guidelines for the Delphi survey technique. *J Adv Nurs* 32: 1008–1015.
29. American Psychiatric Association: Diagnostic and statistic manual of mental disorders: DSM-IV-TR. Washington: APA; 2000.
30. Goldberg D (2010) Should our major classifications of mental disorders be revised? *Br J Psychiatry* 195: 255–256.
31. Koopmans PC, Bültmann U, Roelen CA, Hoedeman R, van der Klink JJ, et al. (2011) Recurrence of sickness absence due to common mental disorders. *Int Arch Occup Environ Health* 84: 193–201.
32. Guzman J, Hayden J, Furlan AD, Cassidy JT, Loisel P, et al (2007) Key factors in back disability prevention. *Spine* 32: 807–815.
33. McKenna HP (1994) The Delphi technique: a worthwhile approach for nursing? *J Adv Nurs* 19:1221–1225.
34. Sumsion T (1998) The Delphi technique: an adaptive research tool. *Br J Occup Ther* 61: 153–156.
35. Green B, Jones M, Hughes D, Williams A (1999) Applying the Delphi technique in a study of GP's information requirements *Health Soc Care Community* 7: 198–205.
36. Goodman CM (1987) The Delphi technique: a critique. *J Adv Nurs* 7: 451–459.
37. Keeney S, Hasson F, McKenna HP (2001) A critical review of the Delphi technique as a research methodology for nursing. *Int J Nurs Stud* 38: 195–200.
38. Kurdyak P, Cairney J (2011) Predicting recurrence of depression. *CMAJ* 183: 1955–1956.
39. Oostrom SH, van Mechelen W, Terluin B, de Vet HC, Knol DL, et al. (2010) A workplace intervention for sick-listed employees with distress: results of a randomized controlled trial. *Occup Environ Med* 67: 596–602.
40. De Vries G, Koeter MW, Nabitz U, Hees AL, Schene AH (2011) Return to work after sick leave due to depression: a conceptual analysis based on perspectives of patients, supervisors, and occupational physicians. *J Affect Disord* 136: 1017–1026.
41. Head J, Ferrie JE, Alexanderson K, Westerlund H, Vahtera J, et al. (2008) Diagnosis-specific sickness absence as a predictor of mortality: the Whitehall II prospective cohort study. *BMJ* 337: a1469.
42. Ferrie JE, Vahtera J, Kivimäki M, Westerlund H, Melchior M, et al. (2009) Diagnosis specific sickness absence and all-cause mortality in the GAZEL study. *J Epidemiol Community Health* 63:50–55.
43. Vahtera J, Westerlund H, Ferrie JE, Head J, Melchior M, et al. (2010) All-cause and diagnosis specific sickness absence as a predictor of sustained sub-optimal health: a 14-year follow-up in the GAZEL cohort. *J Epidemiol Community Health* 64: 311–317.
44. Melchior M, Ferrie JE, Alexanderson K, Goldmerg M, Kivimäki M, et al. (2011) Does sickness absence due to psychiatric disorder predict cause-specific mortality? A 16-year follow-up of the GAZEL occupational cohort study. *Am J Epidemiol* 172: 700–707.
45. Melchior M, Ferrie JE, Alexanderson K, Goldberg M, Kivimäki M, et al. (2009) Using sickness absence records to predict future depression in a working population: prospective findings from the GAZEL cohort. *Am J Public Health* 99:1417–1422.
